# Supplementary material for: Which strategy for molecular probe design? An answer from the integration of spectroscopy and QM modeling
Source: Royal Society of Chemistry journal article supplement (doi:10.1039/c003298k), 2010-01-01
Supplement: c003298k.pdf [file c003298k.pdf]

# Electronic Supplementary Information

## (ESI)

**Which strategy for molecular probe design?**

**An answer from the integration of spectroscopy and QM modeling**

Alberto Marini,<sup>\*a</sup> Aurora Muñoz-Losa,<sup>a</sup> Andrea Pucci,<sup>a,b</sup> Giacomo Ruggeri,<sup>a,b</sup> and

Benedetta Mennucci<sup>a</sup>

[a] Dipartimento di Chimica e Chimica Industriale, via Risorgimento 35, 56126 Pisa, Italy;  
email: [am@ns.dcci.unipi.it](mailto:am@ns.dcci.unipi.it)

[b] INSTM, Unità di Ricerca di Pisa, Via Risorgimento 35, 56126 Pisa, Italy

\* Corresponding Author

## TABLES

**Tables S1:** Computed energies (Hartree), relative energies (kcal/mol) and relative populations (%) at 300 K for **AcAn1** and **AcAn2** in vacuo and in each solvent.

|         | E (Hartree)  |              | E (kcal/mol) |              | Population at 300 K (%) |              |
|---------|--------------|--------------|--------------|--------------|-------------------------|--------------|
|         | <b>AcAn1</b> | <b>AcAn2</b> | <b>AcAn1</b> | <b>AcAn2</b> | <b>AcAn1</b>            | <b>AcAn2</b> |
| Vacuo   | -692.140755  | -692.141805  | 3.409        | 4.009        | 21.9                    | 78.1         |
| Hexane  | -692.146475  | -692.147442  | 3.955        | 4.693        | 23.6                    | 76.4         |
| Acetone | -692.157548  | -692.158647  | 4.971        | 5.075        | 20.9                    | 79.1         |
| DMSO    | -692.158488  | -692.159559  | 5.055        | 6.093        | 21.4                    | 78.6         |
| EtOH    | -692.157825  | -692.158931  | 4.988        | 6.016        | 20.7                    | 79.3         |
| MeOH    | -692.158300  | -692.159403  | 5.024        | 6.062        | 20.8                    | 79.2         |
| Water   | -692.151396  | -692.152469  | 4.866        | 5.905        | 21.4                    | 78.6         |

**Tables S2.n:** DFT calculated and experimentally determined infrared frequencies ( $\text{cm}^{-1}$ ) and intensities of **AcAn** in different solvents. The intensities are normalized with respect to the sum of all the intensities and multiplied by 100.

| <b>1. Hexane</b>                   |                   |                                    |                   |                               |                   |
|------------------------------------|-------------------|------------------------------------|-------------------|-------------------------------|-------------------|
| <b>AcAn1</b>                       |                   | <b>AcAn2</b>                       |                   | <b>Exp</b>                    |                   |
| <b>Scl. Freq.</b><br><b>(cm-1)</b> | <b>Norm. Int.</b> | <b>Scl. Freq.</b><br><b>(cm-1)</b> | <b>Norm. Int.</b> | <b>Freq.</b><br><b>(cm-1)</b> | <b>Norm. Int.</b> |
| 613.3                              | 0.9               | 613.9                              | 0.8               | 621.5                         | 1.3               |
| 626.0                              | 0.7               | 631.2                              | 0.7               | 639.9                         | 0.9               |
| 860.9                              | 2.6               | 851.2                              | 1.0               | 822.0                         | 1.3               |
| 937.3                              | 0.3               | 936.4                              | 0.3               | 942.3                         | 0.9               |
| 962.5                              | 0.7               | 995.0                              | 0.5               | 964.2                         | 1.3               |
| 1148.3                             | 1.9               | 1046.9                             | 0.9               | 1150.6                        | 0.9               |
| 1173.9                             | 5.5               | 1176.6                             | 1.7               | 1184.7                        | 8.9               |
| <b>1208.4</b>                      | <b>19.2</b>       | <b>1212.0</b>                      | <b>14.9</b>       | <b>1217.5</b>                 | <b>20.1</b>       |
| 1331.5                             | 0.7               | 1331.0                             | 1.6               | 1312.2                        | 6.7               |
| ---                                | ---               | 1614.9                             | 0.4               | 1647.5                        | 3.6               |
| ---                                | ---               | ---                                | ---               | 1676.6                        | 1.3               |
| <b>1675.1</b>                      | <b>17.0</b>       | <b>1667.1</b>                      | <b>29.4</b>       | <b>1687.6</b>                 | <b>33.5</b>       |
| 2992.2                             | 0.5               | 2996.3                             | 0.5               | 2934.9                        | 3.1               |
| 3071.9                             | 1.4               | 3051.8                             | 0.7               | 3071.5                        | 6.7               |
| 3089.6                             | 0.7               | 3061.6                             | 1.6               | 3092.3                        | 9.4               |
| <b>R(B/A)</b>                      | <b>0.9</b>        |                                    | <b>2.0</b>        |                               | <b>1.7</b>        |

| 2. CCl <sub>4</sub>  |             |                      |             |                 |             |
|----------------------|-------------|----------------------|-------------|-----------------|-------------|
| AcAn1                |             | AcAn2                |             | Exp             |             |
| Scl. Freq.<br>(cm-1) | Norm. Int.  | Scl. Freq.<br>(cm-1) | Norm. Int.  | Freq.<br>(cm-1) | Norm. Int.  |
| 634.8                | 0.8         | 634.9                | 0.4         | 634.0           | 0.8         |
| 1148.9               | 1.9         | 1137.9               | 2.2         | 1151.4          | 0.6         |
| 1174.0               | 5.7         | 1176.9               | 1.8         | 1168.7          | 0.6         |
| <b>1208.2</b>        | <b>19.1</b> | <b>1211.6</b>        | <b>15.1</b> | <b>1218.9</b>   | <b>17.0</b> |
| 1252.5               | 1.3         | 1253.8               | 1.7         | 1228.9          | 17.0        |
| 1331.6               | 0.7         | 1331.1               | 15.6        | 1312.1          | 1.6         |
| ---                  | ---         | 1346.2               | 1.5         | 1343.1          | 1.6         |
| 1356.7               | 0.9         | 1355.8               | 2.5         | 1353.2          | 2.9         |
| 1386.4               | 3.5         | 1390.9               | 1.8         | 1364.2          | 1.6         |
| 1420.0               | 0.5         | 1421.0               | 0.9         | 1414.4          | 1.6         |
| 1434.8               | 1.2         | 1435.5               | 0.9         | 1432.6          | 1.6         |
| 1446.1               | 1.0         | 1445.2               | 0.8         | 1458.2          | 0.7         |
| 1470.5               | 0.5         | 1466.3               | 1.6         | 1478.9          | 1.3         |
| ---                  | ---         | 1608.4               | 6.9         | 1612.4          | 5.2         |
| <b>1673.3</b>        | <b>16.7</b> | <b>1665.9</b>        | <b>29.4</b> | <b>1683.5</b>   | <b>31.3</b> |
| 2990.2               | 0.4         | 2994.9               | 0.4         | 3012.3          | 1.6         |
| 3080.0               | 1.8         | 3068.9               | 1.8         | 3056.3          | 6.7         |
| <b>R(B/A)</b>        | <b>0.9</b>  |                      | <b>1.9</b>  |                 | <b>1.8</b>  |

| 3. CHCl <sub>3</sub>  |             |                       |             |                 |             |
|-----------------------|-------------|-----------------------|-------------|-----------------|-------------|
| AcAn1                 |             | AcAn2                 |             | Exp             |             |
| Sclد. Freq.<br>(cm-1) | Norm. Int.  | Sclد. Freq.<br>(cm-1) | Norm. Int.  | Freq.<br>(cm-1) | Norm. Int.  |
| 613.0                 | 0.9         | 613.5                 | 0.8         | 608.0           | 0.6         |
| 626.3                 | 0.7         | 631.4                 | 0.6         | 626.0           | 0.7         |
| 634.4                 | 0.8         | 634.4                 | 0.4         | 635.0           | 0.2         |
| 862.7                 | 2.2         | 854.6                 | 0.9         | 865.0           | 0.9         |
| 879.2                 | 1.1         | 880.8                 | 2.4         | 878.0           | 2.4         |
| ---                   | ---         | 896.2                 | 1.8         | 891.0           | 1.9         |
| 917.9                 | 1.6         | 924.2                 | 2.9         | 927.0           | 2.2         |
| 940.6                 | 0.3         | 940.1                 | 0.3         | 948.0           | 0.6         |
| 993.5                 | 0.4         | 994.3                 | 0.5         | 1012.0          | 0.7         |
| 1049.9                | 0.3         | 1046.8                | 1.2         | 1053.0          | 1.1         |
| 1147.7                | 1.9         | 1136.1                | 1.9         | 1152.0          | 1.9         |
| <b>1207.5</b>         | <b>18.6</b> | <b>1211.7</b>         | <b>14.8</b> | ---             | ---         |
| 1252.2                | 0.4         | 1253.3                | 0.7         | 1251.0          | 1.8         |
| ---                   | ---         | 1291.5                | 5.1         | 1293.0          | 4.4         |
| 1330.7                | 0.8         | 1330.3                | 1.8         | 1331.0          | 1.7         |
| 1355.4                | 4.0         | 1345.5                | 0.8         | 1364.0          | 0.7         |
| 1385.6                | 3.8         | 1354.8                | 2.3         | 1391.0          | 2.4         |
| 1418.9                | 0.5         | 1420.0                | 1.0         | 1402.0          | 1.3         |
| 1431.5                | 1.2         | 1432.1                | 1.0         | 1415.0          | 1.3         |
| 1438.4                | 0.8         | 1439.0                | 0.7         | 1434.0          | 1.0         |
| 1444.8                | 1.1         | 1444.1                | 0.9         | 1444.0          | 0.8         |
| 1469.3                | 0.6         | 1465.2                | 1.9         | 1463.0          | 2.3         |
| 1566.5                | 3.4         | 1570.6                | 0.4         | 1579.0          | 4.9         |
| ---                   | ---         | 1606.1                | 9.2         | 1602.0          | 13.7        |
| ---                   | ---         | 1613.5                | 0.4         | 1627.0          | 3.1         |
| <b>1663.5</b>         | <b>16.4</b> | <b>1652.9</b>         | <b>29.7</b> | <b>1673.0</b>   | <b>28.1</b> |
| 2988.5                | 0.3         | 2992.8                | 0.3         | 2997.0          | 6.4         |
| 3063.7                | 1.3         | 3064.1                | 1.2         | 3065.0          | 4.0         |
| 3074.5                | 1.0         | 3074.8                | 1.0         | 3073.0          | 3.9         |
| <b>R(B/A)</b>         | <b>0.9</b>  |                       | <b>2.0</b>  |                 | <b>---</b>  |

| 4. EtOH               |             |                       |             |                 |             |
|-----------------------|-------------|-----------------------|-------------|-----------------|-------------|
| AcAn1                 |             | AcAn2                 |             | Exp             |             |
| Sclد. Freq.<br>(cm-1) | Norm. Int.  | Sclد. Freq.<br>(cm-1) | Norm. Int.  | Freq.<br>(cm-1) | Norm. Int.  |
| 943.2                 | 0.3         | 943.0                 | 0.3         | 942.3           | 2.6         |
| <b>1207.3</b>         | <b>17.9</b> | <b>1211.9</b>         | <b>14.1</b> | ---             | ---         |
| ---                   | ---         | 1603.4                | 13.3        | 1616.1          | 3.8         |
| ---                   | ---         | 1612.0                | 0.3         | ---             | ---         |
| <b>1651.5</b>         | <b>15.7</b> | <b>1639.4</b>         | <b>27.7</b> | <b>1667.8</b>   | <b>28.2</b> |
| <b>R(B/A)</b>         | <b>0.9</b>  |                       | <b>2.0</b>  |                 | <b>---</b>  |

| 5. MeOH               |             |                       |             |                 |             |
|-----------------------|-------------|-----------------------|-------------|-----------------|-------------|
| AcAn1                 |             | AcAn2                 |             | Exp             |             |
| Sclد. Freq.<br>(cm-1) | Norm. Int.  | Sclد. Freq.<br>(cm-1) | Norm. Int.  | Freq.<br>(cm-1) | Norm. Int.  |
| 863.8                 | 1.9         | 857.9                 | 0.9         | 862.0           | 1.1         |
| 992.0                 | 1.3         | 992.9                 | 0.6         | 964.0           | 0.5         |
| <b>1207.6</b>         | <b>17.7</b> | <b>1212.3</b>         | <b>13.9</b> | <b>1202.0</b>   | <b>23.1</b> |
| 1564.6                | 4.4         | 1568.9                | 0.5         | 1565.0          | 0.5         |
| ---                   | ---         | <b>1603.1</b>         | <b>13.9</b> | <b>1617.5</b>   | <b>25.6</b> |
| <b>1651.4</b>         | <b>15.4</b> | <b>1637.5</b>         | <b>27.1</b> | <b>1662.2</b>   | <b>49.7</b> |
| <b>R(B/A)</b>         | <b>0.9</b>  |                       | <b>2.0</b>  |                 | <b>2.1</b>  |
| <b>R(B*/B)</b>        | <b>---</b>  |                       | <b>1.0</b>  |                 | <b>1.1</b>  |

| 6. CH <sub>3</sub> CN |             |                       |             |                 |             |
|-----------------------|-------------|-----------------------|-------------|-----------------|-------------|
| AcAn1                 |             | AcAn2                 |             | Exp             |             |
| Sclد. Freq.<br>(cm-1) | Norm. Int.  | Sclد. Freq.<br>(cm-1) | Norm. Int.  | Freq.<br>(cm-1) | Norm. Int.  |
| 634.0                 | 0.7         | 634.3                 | 0.4         | 642.9           | 1.6         |
| 788.1                 | 0.4         | 798.6                 | 0.4         | 807.9           | 0.5         |
| 880.4                 | 1.2         | 881.7                 | 2.1         | 875.4           | 1.1         |
| 962.8                 | 2.2         | 943.2                 | 0.3         | 965.9           | 1.6         |
| ---                   | ---         | 1134.3                | 1.5         | 1152.9          | 6.4         |
| 1172.3                | 5.4         | 1175.7                | 1.8         | 1178.9          | 7.5         |
| <b>1207.2</b>         | <b>16.8</b> | <b>1211.9</b>         | <b>14.0</b> | <b>1231.9</b>   | <b>23.0</b> |
| 1288.6                | 1.0         | 1290.9                | 5.2         | 1280.3          | 8.6         |
| <b>1652.2</b>         | <b>14.6</b> | <b>1638.2</b>         | <b>27.3</b> | <b>1657.2</b>   | <b>49.7</b> |
| <b>R(B/A)</b>         | <b>0.9</b>  |                       | <b>1.9</b>  |                 | <b>2.2</b>  |

| 7. DMSO                       |                   |                               |                   |                         |                   |
|-------------------------------|-------------------|-------------------------------|-------------------|-------------------------|-------------------|
| <b>AcAn1</b>                  |                   | <b>AcAn2</b>                  |                   | <b>Exp</b>              |                   |
| <b>Scld. Freq.<br/>(cm-1)</b> | <b>Norm. Int.</b> | <b>Scld. Freq.<br/>(cm-1)</b> | <b>Norm. Int.</b> | <b>Freq.<br/>(cm-1)</b> | <b>Norm. Int.</b> |
| 581.6                         | 0.5               | 592.8                         | 0.5               | 598.0                   | 0.6               |
| 728.7                         | 3.2               | 729.6                         | 2.6               | 734.0                   | 0.6               |
| 864.0                         | 1.9               | 858.1                         | 0.8               | 827.0                   | 0.6               |
| <b>1207.3</b>                 | <b>17.7</b>       | <b>1212.0</b>                 | <b>14.0</b>       | <b>1224.0</b>           | <b>31.3</b>       |
| 1384.6                        | 4.2               | 1353.7                        | 2.0               | 1364.0                  | 0.6               |
| 1519.9                        | 3.9               | 1568.8                        | 0.5               | 1560.0                  | 0.6               |
| <b>1651.9</b>                 | <b>15.4</b>       | <b>1637.8</b>                 | <b>27.2</b>       | <b>1654.0</b>           | <b>65.8</b>       |
| <b>R(B/A)</b>                 | <b>0.9</b>        |                               | <b>1.9</b>        |                         | <b>2.1</b>        |

**Table S3.1:**  $^1\text{H}$  NMR chemical shifts of **AcAn**, experimentally determined and theoretically predicted, via the IEF-PCM methods at GIAO-DFT level, in various solvents. The labelling refers to Figure 1 of the paper; moreover the label “CH<sub>3</sub>” indicate the methyl unit, where an average of chemical shift values for H27, H28 and H29 was calculated. The average of absolute residuals (AAR) is also reported in order to compare the experimental with the theoretical data.

|              |                 | <b>CCl<sub>4</sub></b> | <b>CDCl<sub>3</sub></b> | <b>EtOD</b> | <b>MeOD</b> | <b>CD<sub>3</sub>CN</b> | <b>DMSO</b> |
|--------------|-----------------|------------------------|-------------------------|-------------|-------------|-------------------------|-------------|
| <b>EXP</b>   | H12             | 8.4                    | 8.5                     | 8.7         | 8.8         | 8.7                     | 8.6         |
|              | H16             | 8.9                    | 8.8                     | 8.9         | 9           | 8.7                     | 8.8         |
|              | H17             | 7.7                    | 7.9                     | 7.8         | 7.7         | 7.8                     | 7.9         |
|              | H18             | 8.4                    | 8.5                     | 8.7         | 8.8         | 8.7                     | 8.6         |
|              | H19             | 8.4                    | 8.5                     | 8.7         | 8.8         | 8.7                     | 8.6         |
|              | H20             | 7.7                    | 7.9                     | 7.8         | 7.7         | 8.2                     | 8.1         |
|              | H21             | 9.2                    | 8.9                     | 9.2         | 9.2         | 9.1                     | 8.9         |
|              | H22             | 8.2                    | 8.2                     | 8.3         | 8.2         | 8.2                     | 8.2         |
|              | H23             | 9.4                    | 9.2                     | 9.2         | 9.2         | 9.1                     | 9.4         |
|              | CH <sub>3</sub> | 2.4                    | 2.4                     | 2.8         | 2.9         | 2.8                     | 2.7         |
| <b>AcAn1</b> | H12             | 8.4                    | 8.5                     | 8.6         | 8.6         | 8.6                     | 8.7         |
|              | H16             | 8.7                    | 8.9                     | 9.0         | 9.0         | 9.0                     | 9.0         |
|              | H17             | 7.8                    | 7.9                     | 8.0         | 8.0         | 8.0                     | 8.0         |
|              | H18             | 8.4                    | 8.5                     | 8.6         | 8.6         | 8.6                     | 8.6         |
|              | H19             | 8.4                    | 8.5                     | 8.6         | 8.6         | 8.6                     | 8.6         |
|              | H20             | 7.8                    | 7.9                     | 8.0         | 8.0         | 8.0                     | 8.0         |
|              | H21             | 9.0                    | 9.1                     | 9.2         | 9.2         | 9.2                     | 9.2         |
|              | H22             | 8.1                    | 8.2                     | 8.4         | 8.4         | 8.4                     | 8.4         |
|              | H23             | 9.4                    | 9.4                     | 9.4         | 9.4         | 9.4                     | 9.4         |
|              | CH <sub>3</sub> | 2.7                    | 2.8                     | 2.8         | 2.8         | 2.8                     | 2.8         |
|              | <b>AAR</b>      | <b>0.11</b>            | <b>0.10</b>             | <b>0.12</b> | <b>0.18</b> | <b>0.17</b>             | <b>0.12</b> |
| <b>AcAn2</b> | H12             | 8.4                    | 8.5                     | 8.6         | 8.6         | 8.6                     | 8.6         |
|              | H16             | 8.7                    | 8.8                     | 9.0         | 9.0         | 9.0                     | 9.0         |
|              | H17             | 7.8                    | 7.9                     | 8.0         | 8.0         | 8.0                     | 8.1         |
|              | H18             | 8.4                    | 8.5                     | 8.6         | 8.6         | 8.6                     | 8.6         |
|              | H19             | 8.4                    | 8.5                     | 8.6         | 8.6         | 8.6                     | 8.6         |
|              | H20             | 7.8                    | 7.9                     | 8.0         | 8.0         | 8.0                     | 8.1         |
|              | H21             | 9.0                    | 9.0                     | 9.2         | 9.2         | 9.2                     | 9.2         |
|              | H22             | 8.5                    | 8.5                     | 8.4         | 8.4         | 8.4                     | 8.4         |
|              | H23             | 9.1                    | 9.1                     | 9.2         | 9.2         | 9.2                     | 9.2         |
|              | CH <sub>3</sub> | 2.7                    | 2.8                     | 2.8         | 2.8         | 2.9                     | 2.8         |
|              | <b>AAR</b>      | <b>0.15</b>            | <b>0.11</b>             | <b>0.11</b> | <b>0.17</b> | <b>0.15</b>             | <b>0.13</b> |



**Table S3.2:** Experimental  $^{13}\text{C}$  NMR chemical shifts of **AcAn** determined in various solvents. The labelling refers to Figure 1 of the paper.

|     | <b>CCl<sub>4</sub></b> | <b>CDCl<sub>3</sub></b> | <b>EtOD</b> | <b>MeOD</b> | <b>CD<sub>3</sub>CN</b> | <b>DMSO</b> |
|-----|------------------------|-------------------------|-------------|-------------|-------------------------|-------------|
| C1  | 126.2                  | 126.2                   | 127.4       | 127         | 127.1                   | 127.5       |
| C2  | 126.7                  | 126.6                   | 127.4       | 127.3       | 127.1                   | 127.5       |
| C3  | 132.3                  | 132.1                   | 132.7       | 132.4       | 132.3                   | 132.8       |
| C4  | 131.2                  | 131.6                   | 129.7       | 131.1       | 129.8                   | 130.8       |
| C5  | 128.4                  | 128.4                   | 128.6       | 128.7       | 128.5                   | 128.6       |
| C6  | 125.7                  | 125.9                   | 125.7       | 126         | 125.2                   | 125.3       |
| C7  | 124.5                  | 124.8                   | 125.7       | 126         | 125.2                   | 125.3       |
| C8  | 129.1                  | 129.3                   | 129.7       | 130.7       | 129.8                   | 129.7       |
| C9  | 128.7                  | 128.7                   | 128.6       | 128.7       | 128.5                   | 128.3       |
| C10 | 131.2                  | 131.6                   | 130.7       | 130.7       | 130.9                   | 130.8       |
| C11 | 126.7                  | 126.6                   | 127.4       | 128.4       | 127.2                   | 127.5       |
| C13 | 123.3                  | 122.7                   | 121.4       | 122.6       | 121.3                   | 121.5       |
| C14 | 130.8                  | 130.3                   | 130.2       | 130.7       | 130.4                   | 130.8       |
| C15 | 130.8                  | 131.2                   | 134.3       | 133.3       | 133.6                   | 132.8       |
| C24 | 198.9                  | 200.3                   | 201.5       | 201.2       | 201.3                   | 201.7       |
| C26 | 25.6                   | 25.5                    | 24.7        | 24.5        | 24.3                    | 23.9        |

**Table S3.3:** GIAO-DFT  $^{13}\text{C}$  NMR chemical shifts of **AcAn1** conformer calculated via the IEF-PCM methods in various solvents. The average of absolute residuals (AAR) is also reported in order to compare the experimental with the theoretical data. The labelling refers to Figure 1 of the paper.

|            | <b>CCl<sub>4</sub></b> | <b>CDCl<sub>3</sub></b> | <b>EtOD</b> | <b>MeOD</b> | <b>CD<sub>3</sub>CN</b> | <b>DMSO</b> |
|------------|------------------------|-------------------------|-------------|-------------|-------------------------|-------------|
| C1         | 126.1                  | 126.6                   | 127.2       | 127.2       | 127.0                   | 127.2       |
| C2         | 126.8                  | 126.9                   | 127.2       | 127.2       | 127.1                   | 127.3       |
| C3         | 132.2                  | 132.3                   | 132.5       | 132.5       | 132.4                   | 132.5       |
| C4         | 130.9                  | 131.0                   | 131.0       | 131.0       | 131.0                   | 131.0       |
| C5         | 128.2                  | 128.3                   | 128.6       | 128.6       | 128.4                   | 128.6       |
| C6         | 124.8                  | 125.2                   | 125.7       | 125.7       | 125.6                   | 125.8       |
| C7         | 124.4                  | 124.7                   | 125.1       | 125.1       | 125.0                   | 125.2       |
| C8         | 130.4                  | 130.6                   | 131.0       | 131.0       | 130.8                   | 131.0       |
| C9         | 128.5                  | 128.4                   | 128.3       | 128.3       | 128.2                   | 128.3       |
| C10        | 131.3                  | 131.4                   | 131.5       | 131.5       | 131.4                   | 131.5       |
| C11        | 126.7                  | 127.1                   | 127.7       | 127.8       | 127.5                   | 127.8       |
| C13        | 123.6                  | 123.9                   | 124.3       | 124.4       | 124.2                   | 124.4       |
| C14        | 130.3                  | 130.2                   | 130.0       | 130.0       | 130.1                   | 129.9       |
| C15        | 130.9                  | 130.9                   | 131.0       | 130.9       | 130.7                   | 130.9       |
| C24        | 197.9                  | 200.0                   | 202.1       | 202.3       | 202.2                   | 202.4       |
| C26        | 22.2                   | 22.5                    | 22.9        | 22.9        | 22.8                    | 22.9        |
| <b>AAR</b> | <b>0.7</b>             | <b>0.8</b>              | <b>0.9</b>  | <b>0.8</b>  | <b>0.8</b>              | <b>1.3</b>  |

**Table S3.4:** GIAO-DFT  $^{13}\text{C}$  NMR chemical shifts of **AcAn2** conformer calculated via the IEF-PCM methods in various solvents. The average of absolute residuals (AAR) is also reported in order to compare the experimental with the theoretical data. The labelling refers to Figure 1 of the paper.

|            | <b>CCl<sub>4</sub></b> | <b>CDCl<sub>3</sub></b> | <b>EtOD</b> | <b>MeOD</b> | <b>CD<sub>3</sub>CN</b> | <b>DMSO</b> |
|------------|------------------------|-------------------------|-------------|-------------|-------------------------|-------------|
| C1         | 126.0                  | 126.5                   | 127.1       | 127.2       | 127.0                   | 127.2       |
| C2         | 126.9                  | 127.0                   | 127.3       | 127.3       | 127.1                   | 127.3       |
| C3         | 132.3                  | 132.5                   | 132.7       | 132.7       | 132.6                   | 132.7       |
| C4         | 130.9                  | 131.0                   | 131.1       | 131.1       | 131.0                   | 131.1       |
| C5         | 127.9                  | 128.2                   | 128.6       | 128.7       | 128.5                   | 128.7       |
| C6         | 124.9                  | 125.3                   | 125.8       | 125.8       | 125.7                   | 125.8       |
| C7         | 124.7                  | 124.9                   | 125.2       | 125.2       | 125.1                   | 125.2       |
| C8         | 128.7                  | 129.2                   | 130.1       | 130.1       | 129.9                   | 130.2       |
| C9         | 128.7                  | 128.6                   | 128.6       | 128.7       | 128.5                   | 128.6       |
| C10        | 131.5                  | 131.5                   | 131.5       | 131.5       | 131.4                   | 131.5       |
| C11        | 127.3                  | 127.5                   | 128.0       | 128.0       | 127.8                   | 128.0       |
| C13        | 122.1                  | 121.6                   | 121.2       | 121.2       | 121.1                   | 121.2       |
| C14        | 131.5                  | 131.1                   | 130.6       | 130.6       | 130.7                   | 130.6       |
| C15        | 132.8                  | 133.5                   | 134.8       | 134.9       | 134.7                   | 134.9       |
| C24        | 199.9                  | 200.1                   | 202.1       | 202.3       | 202.2                   | 202.4       |
| C26        | 20.8                   | 21.1                    | 21.4        | 21.5        | 21.4                    | 21.4        |
| <b>AAR</b> | <b>0.9</b>             | <b>0.9</b>              | <b>0.8</b>  | <b>0.8</b>  | <b>0.8</b>              | <b>1.1</b>  |

**Table S4** CAM-B3LYP vibrational frequencies (with respect to 0-0 transition) and FC intensities of modes which most contribute to the vibronic structure of the excitation I band of **AcAn2**.

| Norm.Mod | Hexane                    |            | DMSO                      |            | MeOH                      |            | MeOH(+1MeOH)              |            |
|----------|---------------------------|------------|---------------------------|------------|---------------------------|------------|---------------------------|------------|
|          | $\nu$ [cm <sup>-1</sup> ] | Int.[a.u.] |
| 1        | 130                       | 0.04       | 135                       | 0.04       | 134                       | 0.03       | 184                       | 0.01       |
| 2        | 300                       | 0.10       | 302                       | 0.10       | 302                       | 0.10       | 302                       | 0.02       |
| 3        | 383                       | 0.03       | 385                       | 0.02       | 384                       | 0.02       | 384                       | 0.02       |
| 4        | 430                       | 0.05       | 430                       | 0.05       | 430                       | 0.06       | 435                       | 0.02       |
| 5        | 1185                      | 0.02       | 1178                      | 0.02       | 1177                      | 0.02       | 1179                      | 0.01       |
| 6        | 1267                      | 0.02       | 1265                      | 0.02       | 1264                      | 0.02       | 1264                      | 0.01       |
| 7        | 1378                      | 0.08       | 1373                      | 0.10       | 1373                      | 0.10       | 1369                      | 0.03       |
| 8        | 1424                      | 0.2        | 1415                      | 0.09       | 1415                      | 0.09       | 1418                      | 0.02       |
| 9        | 1518                      | 0.02       | 1511                      | 0.06       | 1511                      | 0.06       | 1523                      | 0.01       |
| 10       | 1570                      | 0.10       | 1569                      | 0.09       | 1569                      | 0.09       | 1573                      | 0.02       |
| 11       | 1618                      | 0.02       | 1569                      | 0.09       | 1568                      | 0.09       | 1564                      | 0.01       |
| 12       | 1718                      | 0.02       | 1674                      | 0.02       | 1673                      | 0.02       | 1632                      | 0.01       |
| 13       | 604*                      | 0.02       | 604*                      | 0.02       | 604*                      | 0.02       | 604*                      | 0.03       |
| 14       | 2830*                     | 0.01       | 2831*                     | 0.01       | 2830*                     | 0.01       | 2826*                     | 0.01       |

Assignment of Normal Modes:

1.  $\rho$  CH<sub>3</sub> +  $\rho$  CH(ring A)
2.  $\rho$  C=O +  $\rho$  CH(ring C)
3.  $\delta_s$  CH<sub>3</sub> +  $\rho$  C=C(ring B) +  $\rho$  CH(ring A)
4.  $\delta_s$  CH<sub>3</sub> +  $\nu_s$  C=C(ring B) +  $\rho$  CH(ring C)
5.  $\delta_s$  CH(ring A)
6.  $\delta_s$  CH(rings A,B,C) +  $\nu_s$  C<sub>Ar</sub>-CO
7.  $\rho$  CH (ring A) +  $\nu_{as}$  C=C (rings B,C)
8.  $\rho$  CH (ring B) +  $\nu_{as}$  C=C (rings A,B)
9.  $\delta_s$  CH(rings A,C) +  $\nu_s$  C=C (rings A,B)
10.  $\rho$  CH (ring C) +  $\nu_{as}$  C=C (rings A,C)
11.  $\delta_s$  CH(rings A,B,C) +  $\nu_{as}$  C=C (rings A,B,C)
12.  $\nu_s$  C=O +  $\rho_s$  CH(ring C)

**Nomenclature:**  $\nu_{as}$  asymmetrical stretching,  $\nu_s$  symmetrical stretching,  $\delta_s$  in-plane bending (scissoring),  $\rho$  in-plane bending (rocking),  $\omega$  out-of-plane bending (wagging),  $\tau$  out-of-plane bending (twisting).

## FIGURES

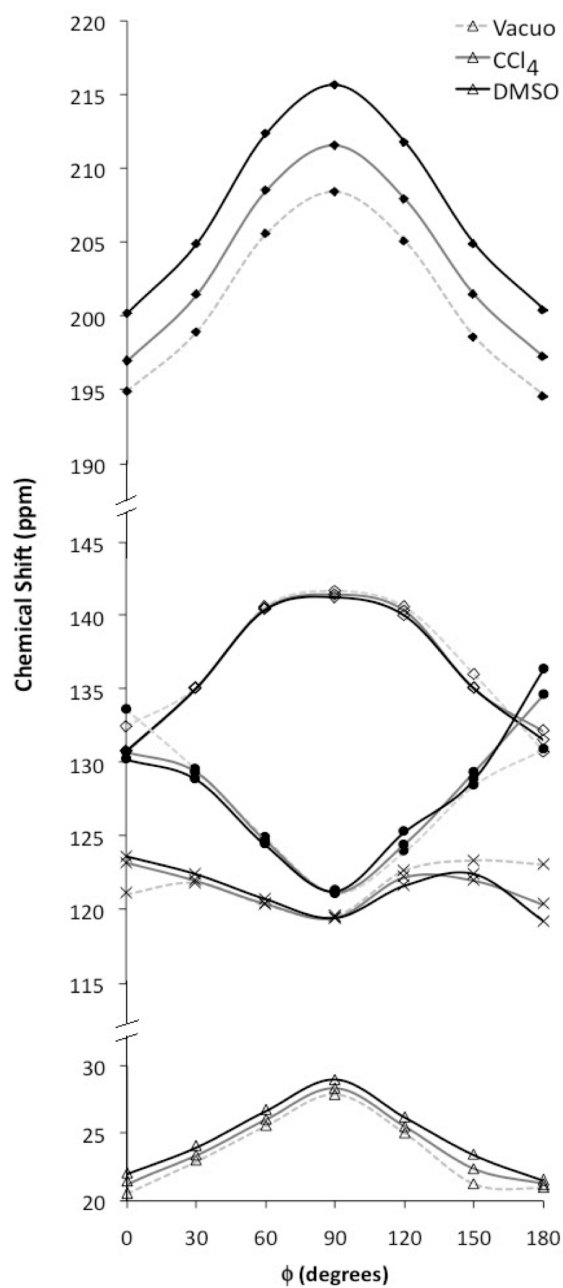

**Figure S2:** Plot of the isotropic chemical shifts for carbons C26 (open triangles), C13 (crosses), C14 (open rhombs), C15 (filled circles) and C24 (filled rhombs) of **AcAn** in function of variation of dihedral angle  $\phi$ .

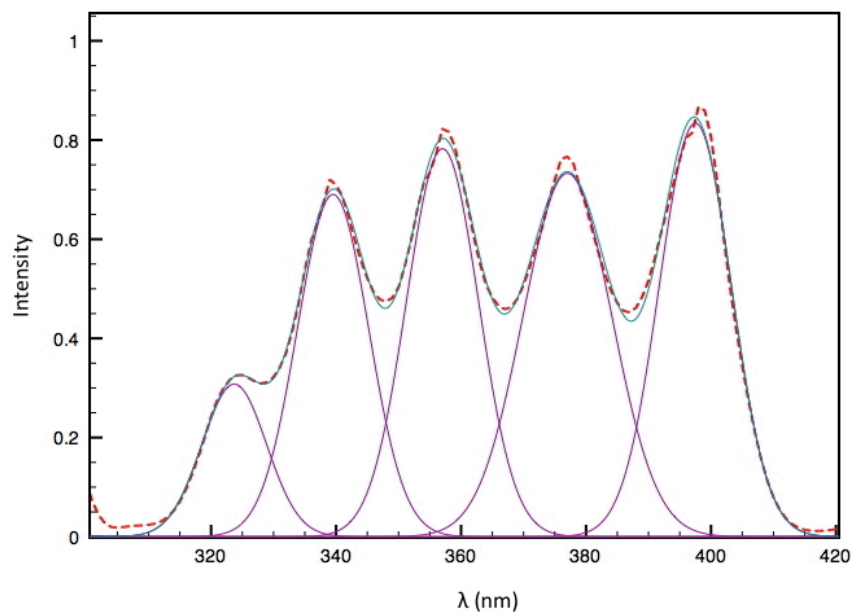

**Figure S3:** Deconvolution of the vibronic band in the absorption spectrum of **AcAn** dissolved in Heptane.

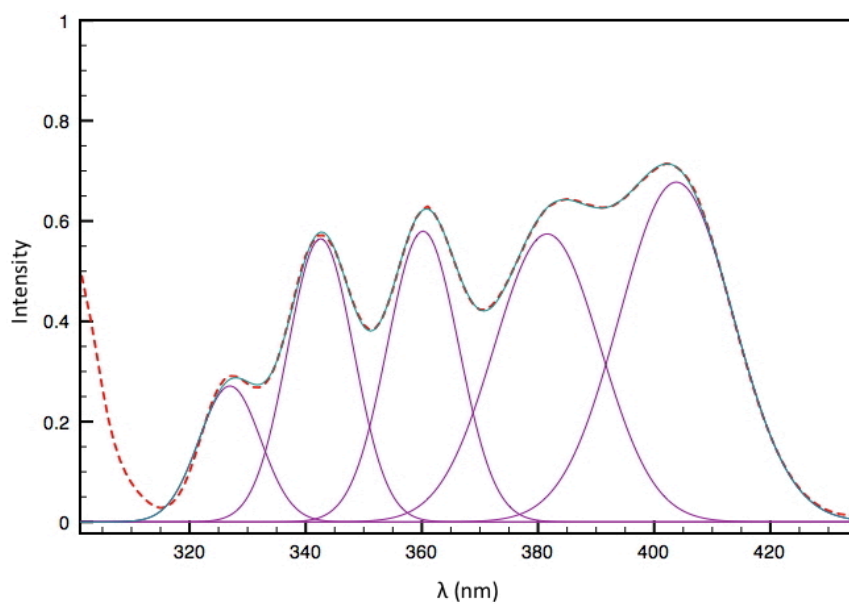

**Figure S4:** Deconvolution of the vibronic band in the absorption spectrum of **AcAn** dissolved in DMSO.

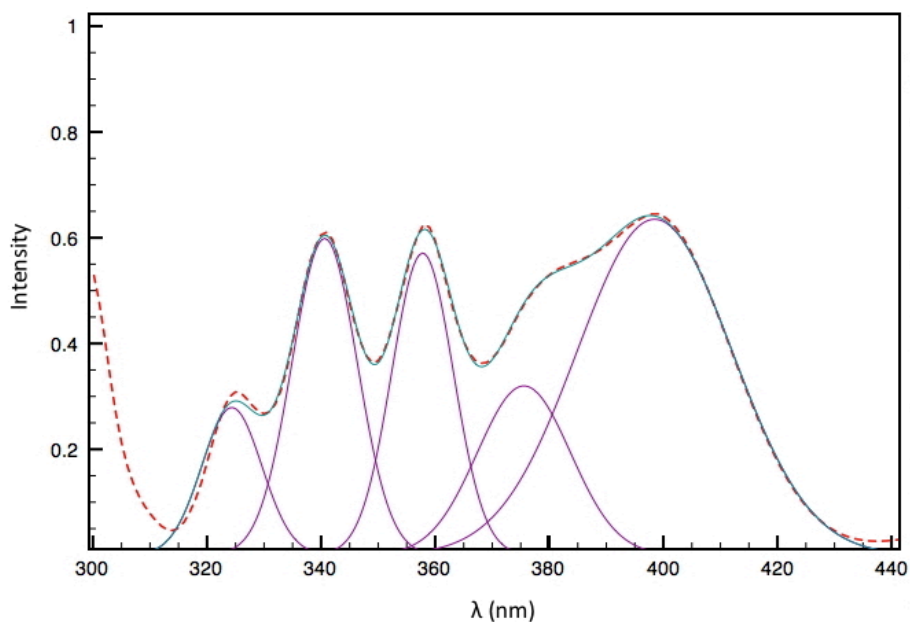

**Figure S5:** Deconvolution of the vibronic band in the absorption spectrum of **AcAn** dissolved in Methanol. Here the two low frequency peaks are fitted with two broad gaussians.

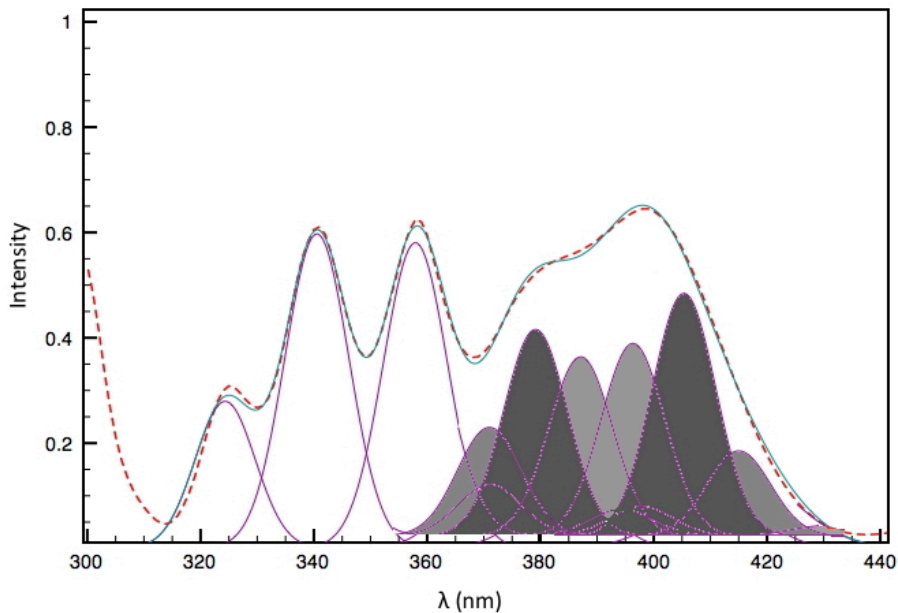

**Figure S6:** Deconvolution of the vibronic band in the absorption spectrum of **AcAn** dissolved in Methanol. Here the two low frequency peaks are fitted with five gaussians each, with a line broadening comparable to the ones used in the fitting of the higher frequency peaks.
